# Supplementary material for: Physical Activity in High-Risk Women reduces Breast Cancer Risk: UK Biobank Study
Source: Research Square preprint supplement (doi:10.21203/rs.3.rs-8862660/v1), 2026-02-23
Supplement: Supplementary file 1 [file 681f57e0b8302f8a38d9fd11.docx]

**Supplementary Table 1. Participant characteristics by activity level (IPAQ and Accelerometer)**
 Values are presented as mean ± SD for continuous variables and percentages for categorical variables. Activity levels (low, moderate, high) were defined using tertiles of overall activity in the full UK Biobank dataset.
 Asterisks (*) indicate statistically significant differences across activity groups (p < 0.05).
 NS indicates non-significant differences (p > 0.05).
 “–” denotes data not available or not applicable.

| Variable | Accelerometer – Low Activity | Accelerometer – Moderate Activity | Accelerometer – High Activity | p-value (Accelerometer) | IPAQ – Low Activity | IPAQ – High Activity | p-value (IPAQ) |
| --- | --- | --- | --- | --- | --- | --- | --- |
| Cohort size | 6,077 | 12,270 | 9,943 | − | 15,569 | 13,588 | − |
| Age at activity measurement (years) | 63.4 (±7.6)* | 61.3 (±7.7)* | 58.8 (±7.5)* | <0.001 | 55.7 (±7.8) NS | 55.8 (±7.9) NS | 0.582 |
| Townsend deprivation index | –1.6 (±2.9)* | –1.7 (±2.8)* | –1.7 (±2.8)* | 0.035 | –1.6 (±2.9) NS | –1.6 (±2.8) NS | 0.625 |
| Family history of BC (%) | 11.3 NS | 10.9 NS | 10.5 NS | 0.278 | 11.7 NS | 11.9 NS | − |
| Age at menarche (years) | 12.9 (±1.6)* | 12.9 (±1.5)* | 13.1 (±1.5)* | <0.001 | 13.0 NS | 13.0 NS | 0.545 |
| Age at first live birth (years) | 25.7 (±4.5)* | 26.5 (±4.5)* | 27.3 (±4.7)* | <0.001 | 26.6 (±4.6)* | 26.1 (±4.6)* | <0.001 |
| Parity | 1.7 NS | 1.7 NS | 1.7 NS | 0.980 | 1.7 NS | 1.8 (±1.2)* | <0.001 |
| Ever taken oral contraceptive pill (%) | 83.5 NS | 86.5 NS | 87.9 NS | − | 84.9 NS | 85.1 NS | − |
| Had menopause (%) | 63.4 NS | 58.6 NS | 49.8 NS | − | 57.7 NS | 58.7 NS | − |
| Age at menopause (years) | 50.1 (±4.7)* | 50.2 (±4.7)* | 49.9 (±4.7)* | 4.46×10⁻⁶ | 50.2 (±4.7)* | 50.0 (±4.9)* | 3.11×10⁻⁵ |
| Ever used HRT (%) | 41.3 NS | 34.1 NS | 24.8 NS | − | 33.5 NS | 34.2 NS | − |
| Current smoking (%) | 7.6 NS | 5.7 NS | 5.0 NS | − | 6.1 NS | 6.3 NS | − |
| Alcohol ≥1 drink/week (%) | 62.8 NS | 70.8 NS | 72.5 NS | − | 69.8 NS | 69.7 NS | − |
| Standing height (cm) | 163.3 (±6.3)* | 163.5 (±6.2)* | 163.6 (±6.1)* | 0.017 | 163.5 NS | 163.4 NS | 0.055 |
| BMI (kg/m²) | 28.1 (±5.6)* | 26.1 (±4.5)* | 24.6 (±3.9)* | <0.001 | 26.3 (±4.8)* | 25.6 (±4.4)* | <0.001 |
| Whole body fat mass (kg) | 29.6 (±10.8)* | 25.4 (±8.9)* | 21.9 (±7.7)* | <0.001 | 25.7 (±9.5)* | 24.1 (±8.7)* | <0.001 |
| Comparative body size at age 10 – Plumper (%) | 20.1 NS | 17.6 NS | 16.0 NS | − | 17.0 NS | 16.5 NS | − |
| Summed MET-min/week | 1,915 (±1,986)* | 2,352 (±2,204)* | 2,947 (±2,543)* | <0.001 | 1,439 (±626)* | 4,569 (±2,489)* | <0.001 |
| Overall acceleration average (mg) | 19.5 (±2.7)* | 26.9 (±2.3)* | 37.5 (±6.4)* | <0.001 | 28.3 (±7.5)* | 31.3 (±26.0)* | <0.001 |
| Standard PRS for BC | –0.2 NS | –0.2 NS | –0.2 NS | 0.980 | –0.1 NS | –0.1 NS | 0.596 |
